# Supplementary material
Source: publisher site journal article supplement (http://www.degruyter.com/publication/journal_key/CHEM/downloadAsset/CHEM_CFP_International%20Conference%20on%20Functional%20Nanomaterials%20and%20Nanodevices%202024.pdf)
Supplement: Supplementary file 1 [file CHEM_CFP_International%20Conference%20on%20Functional%20Nanomaterials%20and%20Nanodevices%202024.pdf]

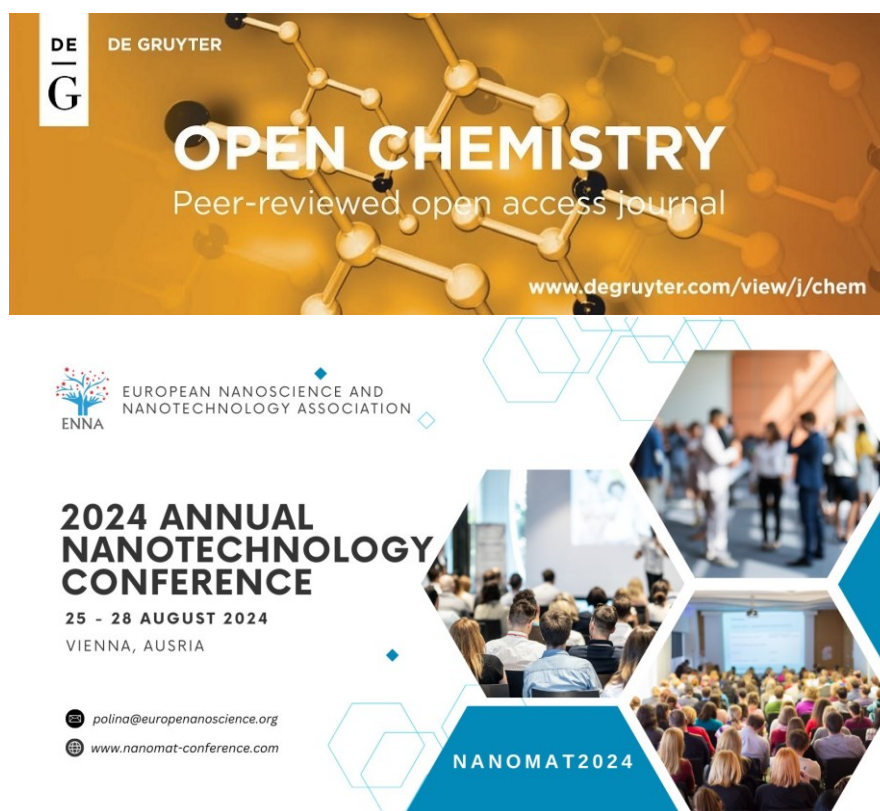

**DE GRUYTER**

**International Conference on Functional Nanomaterials and Nanodevices 2024 (NANOMAT2024)**

Vienna, Austria 25-28 August 2024

On behalf of the organising committee, we are pleased to announce that the upcoming 8th edition of the **International Conference on Functional Nanomaterials and Nanodevices 2024 (NANOMAT2024)** will be held on August 25–28, 2024, in the Hotel Arcotel Wimberger, Vienna, Austria. It is with immense pleasure and great honour that we would like to welcome you all to join us.

We are certain that this will be a platform to gather and disseminate the latest knowledge in recent advancements in emerging areas of diversified research fields covered during a conference that will provide a platform for the participants to share experiences and knowledge through several symposia.

**Submission deadline: 30.09.2024**

## HOW TO SUBMIT

The authors are kindly invited to register at our paper [processing system](#) and submit their contribution (both original papers or reviews are welcome). We offer a discount to for attendees of the conference. **All attendees of both conferences will receive 25 % discount for our Open Chemistry. Please write about attending the conference in the cover letter.** All manuscripts will undergo the standard peer review process (single-blind, at least two independent reviewers) and will be treated in the same way as other regular articles (indexing, abstracting, immediate publication, etc.). Instructions for authors are available [here](#).

In case of any questions please contact Open Chemistry Managing Editor:  
Małgorzata Komadowska ([openchemistry@degruyter.com](mailto:openchemistry@degruyter.com)).

<https://www.degruyter.com/chem>
